## Heart age estimated using explainable advanced electrocardiography

Thomas Lindow, MD, PhD<sup>1,2,3\*</sup>, Israel Palencia-Lamela,<sup>1,4\*</sup> Todd T Schlegel, MD<sup>5,6</sup>,  
Martin Ugander, MD, PhD<sup>1,5</sup>

1. Kolling Institute, Royal North Shore Hospital, and University of Sydney, Sydney, Australia

2. Department of Clinical Physiology, Research and Development, Växjö Central Hospital, Region Kronoberg, Sweden

3. Clinical Physiology, Clinical Sciences, Lund University, Sweden

4. Davidson College, Davidson, North Carolina, USA

5. Department of Clinical Physiology, Karolinska Institutet, and Karolinska University Hospital, Stockholm, Sweden

6. Nicollier-Schlegel SARL, Trélex, Switzerland

*\*Shared first-authorship by equal contribution*

**Fundings:** TL is currently under the support of postdoctoral research grants from The Swedish Heart-Lung Foundation (grant no 20200553), the Swedish Cardiac Society, the Royal Swedish Academy of Sciences (grant no LM2019-0013), Women and Health Foundation, Region Kronoberg (grant no 8301), The Swedish Heart and Lung Association (grant no LKH1387), Swedish Association of Clinical Physiology, and the Scandinavian Society of Clinical Physiology; Nuclear Medicine. The study was funded in part by grants (PI Ugander) from New South Wales Health, Heart Research Australia, and the University of Sydney.

**Author contributions:** TL and IPL contributed to study design, performed the data analysis, wrote the first manuscript drafts, prepared the figures, and are shared first authors by equal contributions. TTS curated the data, contributed to study design, performed the prediction modeling, and critically revised the manuscript. MU designed the study, provided supervision, and critically revised the manuscript. All authors read and approved the final version of the manuscript.

### **Competing interests:**

TL, IPL: None

TTS is owner and founder of Nicollier-Schlegel SARL, which performs ECG interpretation consultancy using software that can quantify the advanced ECG measures used in the current study. TTS and MU are owners and founders of Advanced ECG Systems, a company that is developing commercial applications of advanced ECG technology used in the current study.

**Corresponding author:** Martin Ugander, martin.ugander@ki.se, Professor of Cardiac Imaging, University of Sydney, Sydney, Australia, and Karolinska Institute, Sweden.

39 **Background:** Electrocardiographic (ECG) Heart Age conveying cardiovascular risk has been  
40 estimated by both Bayesian and artificial intelligence approaches. We hypothesized that  
41 explainable measures from the 10-second 12-lead ECG could successfully predict Bayesian  
42 ECG Heart Age.

43 **Methods:** Advanced analysis was performed on ECGs from healthy subjects and patients  
44 with cardiovascular risk or proven heart disease. Regression models were used to predict a  
45 Bayesian 5-minute ECG Heart Age from the standard resting 10-second 12-lead ECG. The  
46 difference between 10-second ECG Heart Age and chronological age was compared.

47 **Results:** In total, 2,771 subjects were included (n=1682 healthy volunteers, n=305 with  
48 cardiovascular risk factors, n=784 with cardiovascular disease). Overall, 10-second Heart Age  
49 showed strong agreement with the 5-minute Heart Age ( $R^2=0.94$ ,  $p<0.001$ , mean $\pm$ SD bias  
50  $0.0\pm 5.1$  years). The difference between 10-second ECG Heart Age and chronological age was  
51  $0.0\pm 5.7$  years in healthy individuals,  $7.4\pm 7.3$  years in subjects with cardiovascular risk factors  
52 ( $p<0.001$ ), and  $14.3\pm 9.2$  years for patients with cardiovascular disease ( $p<0.001$ ).

53 **Conclusions:** ECG Heart Age can be accurately estimated from a 10-second 12-lead ECG in  
54 a transparent and explainable fashion based on known ECG measures, without artificial  
55 intelligence techniques. The difference between ECG Heart Age and chronological age  
56 increases markedly with cardiovascular risk and disease.

57 **Keywords:** vascular age; electrocardiography cardiovascular risk prediction; advanced  
58 electrocardiography; vectorcardiography

59

60

## 61 **Background**

62 Cardiovascular disease is a significant contributor to mortality, and pathological processes  
63 begin early and can progress silently for many years<sup>1-3</sup>. Many of the risk factors for  
64 developing cardiovascular disease are lifestyle-related<sup>4</sup>. Fortunately, several of these are  
65 modifiable, and risk can therefore be reduced for example by smoking cessation, dietary  
66 changes and increased physical activity<sup>5,6</sup>. To accomplish this, an individual must fully  
67 understand their risk and become motivated to act upon it. One way of communicating risks  
68 to the patient is to present the risk as a “Heart Age”, which can be contrasted to the patient’s  
69 chronological age. A Heart Age can either be determined by translating risk factor scores to  
70 what age that score would represent in an individual with no risk factors, or it can be based on  
71 electrocardiographic changes<sup>7-12</sup>. Describing the risk to the patient using Heart Age has been  
72 reported to reduce metabolic risk factors and may have the advantage of being easily  
73 understood by the patient<sup>11,13</sup>. A similar approach has been applied when conveying risk to  
74 smokers by describing how ‘old’ their lungs are, and such an approach increased the chance  
75 of smoking cessation<sup>14</sup>.

76 Moving beyond but not excluding basic ECG measurements such as heart rate and waveform  
77 amplitudes and durations, the diagnostic output from the ECG can be further substantially  
78 improved by using combinations of advanced ECG measures from 12-lead-ECG-derived  
79 vectorcardiography and waveform complexity<sup>15-17</sup>. An accurate ECG Heart Age using  
80 advanced, 5-minute, 12-lead ECG was developed in 2014, based on Bayesian statistics<sup>9</sup>. The  
81 Bayesian approach was transparent in so much as the advanced ECG measures contributing to  
82 the ECG Heart Age were well-described. After being trained on a set of healthy individuals,  
83 this approach yielded increased ECG Heart Ages for subjects at risk of cardiovascular disease  
84 and even higher ECG Heart Ages for those with established cardiovascular disease<sup>9</sup>.  
85 However, the reliance on 5-minute, high-fidelity 12-lead ECG recordings lessens the

86 likelihood of widespread clinical use. If standard 10-second ECG recordings could be used  
87 instead, the clinical impact might be enhanced. Moreover, artificial intelligence has been used  
88 to estimate ECG Heart Age using the 10-second resting 12-lead ECG<sup>7,8,10</sup>. However, artificial  
89 intelligence techniques are limited by their “black box” approach, whereby the clinician does  
90 not have transparency as to the exact source(s) of the changes in the ECG that can affect an  
91 ECG Heart Age or other output<sup>18,19</sup>. Therefore, the aim of the study was to predict 5-minute  
92 ECG Heart Age from measures available by 10-second 12-lead ECG, and to compare the 10-  
93 second ECG Heart Age to chronological age in healthy subjects, subjects with cardiovascular  
94 risk factors, and patients with established cardiovascular disease. We hypothesized that 10-  
95 second 12-lead ECG recordings could accurately predict Bayesian ECG Heart Ages derived  
96 from 5-minute 12-lead ECG recordings.

97

## 98 **Methods**

99 A database of de-identified patients with both 5-minute and 10-second 12-lead ECG  
100 recordings was utilized for the study<sup>9</sup>. Within that database, healthy individuals, patients at  
101 cardiovascular risk, and patients with established cardiovascular disease were included. All  
102 healthy subjects were low-risk asymptomatic volunteers with absence of any cardiovascular  
103 or systemic disease, based on clinical history and physical examination. Exclusion criteria for  
104 the healthy subjects included increased blood pressure at physical examination ( $\geq 140/90$  mm  
105 Hg), treatment for hypertension or diabetes, or active smoking. Patients with established  
106 cardiovascular disease were included based on the presence of either coronary heart disease  
107 (determined by coronary angiography with at least one obstructed vessel ( $\geq 50\%$ ) in at least  
108 one major native coronary vessel or coronary graft, or, if coronary angiography was either  
109 unavailable or clinically not indicated, one or more reversible perfusion defects on 99m-Tc-  
110 tetrofosmin single-photon emission computed tomography (SPECT)<sup>20-22</sup>), left ventricular

111 hypertrophy (LVH) based on imaging evidence of at least moderate, concentric wall  
112 thickening according to guidelines of the American Society of Echocardiography<sup>23</sup>, left  
113 systolic dysfunction (left ventricular ejection fraction  $\leq 50\%$ ) at echocardiography, cardiac  
114 magnetic resonance imaging (CMR) or SPECT, or findings suggestive of  
115 dilated/hypertrophic/ischemic cardiomyopathy at echocardiography or CMR<sup>16</sup>. Finally,  
116 subjects at cardiovascular risk were included based on the presence of cardiovascular risk  
117 factors such as hypertension or diabetes but no confirmed established cardiovascular disease<sup>9</sup>.

118 Based on the above, three groups of study participants were included: healthy subjects,  
119 subjects at cardiovascular risk, and patients with established cardiovascular disease. By  
120 methodological design, only healthy subjects were initially included when considering optimal  
121 measures of ECG available from 10-second 12-lead ECG for predicting the 5-minute ECG  
122 Heart Age. The 10-second ECG measures considered for the prediction model included: (1)  
123 From the conventional ECG: heart rate, R-to-R, P-wave, PR, QRS, QT, QTc, and TQ interval  
124 durations, as well as the conventional ECG amplitudes and axes; (2) From the transformation  
125 of the 12-lead ECG to the Frank X, Y and Z lead vectorcardiogram (VCG) via Kors'  
126 transform<sup>24-28</sup>: the spatial means and peaks QRS-T angles, the spatial ventricular gradient and  
127 its individual QRS and T components, the spatial QRS- and T-wave axes (azimuths and  
128 elevations), waveform amplitudes and areas, including those in the three individual  
129 vectorcardiographic planes, and spatial QRS- and T-wave velocities; and (3) measures of  
130 QRS- and T-wave waveform complexity based on singular value decomposition after signal  
131 averaging<sup>29-31</sup>.

132 For all study participants, the difference between the 10-second ECG Heart Age and the  
133 chronological age was also calculated. Results were then compared between the three groups  
134 defined above. All participants gave written informed consent. All recordings were obtained  
135 under Institutional Review Board (IRB) approvals from NASA's Johnson Space Center and

136 partner hospitals that fall under IRB exemptions for previously collected and de-identified  
137 data. The study was performed in accordance with the Declaration of Helsinki.

### 138 *Statistical analysis*

139 Continuous variables were described using mean and standard deviation (SD). The chi-  
140 squared test was used to test for proportional differences between groups. Student's *t* test was  
141 used to compare group means. The 10-second ECG Heart Age was first derived only in the  
142 healthy subject group through a process of feature selection, via optimized stepwise  
143 procedures, of measures available from 10-s, standard-fidelity ECG recordings, first using  
144 univariable linear regression, and finally as multivariable linear regression, to best predict the  
145 5-minute ECG Heart Age<sup>9</sup>. The best model was defined as the model with highest R<sup>2</sup> value  
146 that was also the most parsimonious, i.e., a model with statistically equal performance that  
147 incorporated a lesser number of measures was considered more parsimonious due to less  
148 proneness to over-fitting. The best model from the healthy volunteers was then applied  
149 forward to an expanded population that also included the other two groups (cardiovascular  
150 risk and cardiovascular disease, respectively), while not changing any of the included  
151 variables, and only allowing optimization of the included coefficients. The final sex-specific  
152 model was then applied across all three groups as the 10-second ECG Heart Age, and  
153 comparisons with 5-minute ECG Heart Age are presented as scatter plots and Bland-Altman  
154 plots. A two-sided p-value of 0.05 was used as to define statistical significance. Statistical  
155 analyses were performed using SAS JMP version 11.0, SAS Institute Inc, Cary, NC, USA,  
156 and R version 3.5.3R, R Foundation for Statistical Computing, Vienna, Austria,  
157 <https://www.R-project.org/>.

158

159

160 **Results**

161 In total, 2,771 patients were included (n=1682 healthy volunteers, n=305 subjects with  
162 cardiovascular risk factors, n=784 with cardiovascular disease). Baseline characteristics are  
163 presented in Table 1. The ECG measures included in the final prediction models are presented  
164 in Table 2 (males) and Table 3 (females).

165 The 10-second ECG Heart Age showed excellent agreement with the 5-minute Heart Age  
166 ( $R^2=0.94$ ,  $p<0.001$ , mean $\pm$ SD bias 0.0 $\pm$ 5.2 years), Figure 1. Agreement was strong for both  
167 males and females ( $R^2=0.91$ ,  $p<0.001$ , and  $R^2=0.92$ ,  $p<0.001$  respectively). In healthy  
168 subjects, there was no difference in ECG Heart Age and chronological age (0.0 $\pm$ 5.7 years). In  
169 subjects with cardiovascular risk factors, the difference was higher (7.4 $\pm$ 7.3 years,  $p<0.001$ ).  
170 Patients with cardiovascular disease showed the largest difference between ECG Heart Age  
171 and chronological age (14.3 $\pm$ 9.2 years,  $p<0.001$  when compared to subjects at cardiovascular  
172 risk), Figure 2.

173 **Discussion**

174 We found that ECG Heart Age based on measures of advanced ECG can be accurately  
175 predicted from standard resting 10-second 12-lead ECG recordings. This facilitates  
176 widespread use of ECG Heart Age in routine clinical settings, since neither specialized ECG  
177 machines nor unusually lengthy recordings are necessary. Also, if digital ECG raw data are  
178 available and the recording is of acceptable quality, ECG Heart Age can be retrospectively  
179 determined. Further, we found ECG Heart Age to be similar to chronological age in healthy  
180 individuals, while the ECG Heart Age was increasingly older with increasing cardiovascular  
181 disease status. This suggests that the ECG Heart Age is likely to provide accurate  
182 cardiovascular risk prediction, although validation in other datasets is necessary.

183

184 *Explainability and transparency of variables that contribute to ECG Heart Age*

185 For an estimation of Heart Age to be accurate in predicting an age that is similar to the  
186 chronological age when the heart is healthy, and increased when the heart is diseased, it is  
187 desirable that the included ECG measures change with age, and that the change is augmented  
188 with increasing cardiovascular risk or disease severity. Beyond age itself, the two ECG  
189 measures that had the strongest influence (highest t ratio) on the model were P-wave duration  
190 and spatial QT duration, and these measures fit this description well. P-wave duration  
191 increases with age<sup>32</sup>, and increased P-wave duration can be seen in advanced cardiovascular  
192 pathologies, e.g. heart failure and cardiac amyloidosis<sup>33</sup>. Similarly, QT duration increases  
193 with age<sup>34</sup>. Further, QT prolongation is associated with increased of cardiovascular risk, even  
194 beyond the rare long QT syndromes<sup>35</sup>, and with incrementally increased risk in advanced  
195 ages<sup>36</sup>. These general characteristics are also true for increased heart rate and for leftward  
196 shifting of the frontal plane QRS axis<sup>37-40</sup>. The other measures included in the score track  
197 changes in the vectorcardiographic QRS and T, and in T-wave complexity by singular value  
198 decomposition. Such changes are also known to occur in conditions associated with increased  
199 cardiovascular risk, such as hypertension and diabetes<sup>41</sup>, and in established cardiovascular  
200 disease, in which they often provide strong diagnostic and prognostic information<sup>24-27,29-31</sup>.  
201 Notably, these changes are not easily detectable by visual interpretation of a standard 12-lead  
202 ECG. How these ECG measures can affect the ECG Heart Age is exemplified in Figure 3.  
203 Taken together, the described ECG measures that contribute in a multivariable fashion to the  
204 ECG Heart Age all have physiologically reasonable associations with age and disease in a  
205 way that is transparent to the assessing clinician, thus providing important explainability to  
206 the model.

207

208



209 *Differences compared to Bayesian 5-minute ECG Heart Age*

210 The original, Bayesian 5-minute ECG Heart Age requires information from measures of beat-  
211 to-beat heart rate and QT variability,<sup>9</sup> and of the root-mean square voltage or other aspects of  
212 high-frequency (high fidelity) components of the QRS complex<sup>42-44</sup>. However, 10-second-  
213 duration recordings of standard fidelity do not allow for such measures, and therefore they  
214 were not included in the 10-second ECG Heart Age. However, unlike the original Bayesian 5-  
215 minute ECG Heart Age, the 10-second ECG Heart Age should be derivable from any standard  
216 12-lead ECG machine, as long as it is sufficiently equipped with software that can measure  
217 the included measures and calculate the 10-second ECG Heart Age. The presented 10-second  
218 ECG Heart Age might therefore be anticipated to contribute to more widespread clinical  
219 penetration and use.

220

221 *Comparison with other Heart (or Vascular) Ages*

222 Different means of expressing cardiovascular risk by translating it into a heart or vascular age  
223 have recently been published<sup>13</sup>. Attia, et al, showed that by using a deep neural network  
224 (DNN) artificial intelligence (AI) technique, a patient's chronological age could be predicted,  
225 and that if the difference between the predicted and actual age was small, prognosis was good  
226 <sup>8</sup>. When Heart Age by Attia et al's technique was older than the chronological age, the risk of  
227 future death was increased<sup>7</sup>. This corresponds well to the findings in our study that ECG  
228 Heart Age increased with increasing burden of cardiovascular risk. However, the prognostic  
229 value of the ECG Heart Age presented in the current study requires additional validation.  
230 Furthermore, another AI method similar to that of Attia et al reported similarly encouraging  
231 results<sup>10</sup>. However, although the results of such AI studies are promising, DNN-based AI  
232 techniques are inherently problematic in several respects, especially in relation to their lack of  
233 transparency and explainability, i.e., the 'black box' of AI<sup>18,19</sup>. Without the ability to know the

234 exact features of the 12-lead ECG that are most important in a given DNN model's output,  
235 both interpretability and ethical accountability are compromised<sup>45</sup>. Moreover, it is effectively  
236 impossible for a clinician to identify, when critically evaluating the diagnostic output of a  
237 DNN-based AI model, the possible contribution to the result from methodological artifact or  
238 bias merely related to noise or to differing technical specifications between different ECG  
239 machines<sup>46</sup>. Alternatively, it is not possible to know if unanticipated results are possibly just  
240 related to excess dependency on the particular characteristics of a given DNN AI model's  
241 training set<sup>47</sup>. In addition, a major flaw in both DNN-based AI models is that the age  
242 predictions were made using datasets including individuals with both cardiovascular risk  
243 factors and established disease<sup>8,10</sup>. For ECG Heart Age to be used as a marker of  
244 cardiovascular risk, it is imperative that ECG Heart Age agrees with chronological age in  
245 healthy populations, since it is the deviations from the line of identity in this relationship that  
246 form the basis of the assumed risk increase<sup>8</sup>.  
247 Hence, we believe that the pursuit of an ECG Heart Age developed from heart-healthy  
248 subjects of varying ages, but without a black-box DNN or related AI methodology is valuable,  
249 and that the present results provide sufficient confirmation of accuracy to encourage further  
250 development. In addition, models in which the assessments were based on age predictions in  
251 healthy subjects will likely outperform models that were not. And finally, the use of more  
252 transparent regression models will also increase the ability of clinicians to better understand  
253 the origin of any unexpected result, and to thereafter relay it to the patient with a more  
254 convincing sense of trust and ethical accountability<sup>45</sup>.

255

## 256 *Limitations*

257 Using the same dataset for training and validation, our results can only be considered as  
258 proof-of-concept. Although the difference between ECG Heart Age and the subjects'

259 chronological age increased with increasing cardiovascular risk and/or disease, the prognostic  
260 value is unknown. Also, although ECG Heart Age was highly accurate, the precision cannot  
261 be reliably defined in this study. These aspects therefore need to be addressed in future  
262 studies.

263

#### 264 *Conclusion*

265 We show that ECG Heart Age can be accurately, transparently, and explainably estimated  
266 from a standard 10-s, resting 12-lead ECG utilizing multiple, discrete conventional and  
267 advanced ECG measures. The difference between ECG Heart Age and subjects'  
268 chronological age increases with increasing cardiovascular risk and disease. The prognostic  
269 value of our transparent and explainable 10-second ECG Heart Age requires prospective  
270 evaluation in future studies.

271

272

273 **References**

- 274 1 Bergström, G. *et al.* Prevalence of Subclinical Coronary Artery Atherosclerosis in the  
275 General Population. *Circulation* **144**, 916-929, doi:10.1161/circulationaha.121.055340  
276 (2021).
- 277 2 Townsend, N. *et al.* Cardiovascular disease in Europe: epidemiological update 2016.  
278 *Eur Heart J* **37**, 3232-3245, doi:10.1093/eurheartj/ehw334 (2016).
- 279 3 Badimon, L. & Vilahur, G. Thrombosis formation on atherosclerotic lesions and  
280 plaque rupture. *J Int Med* **276**, 618-632, doi:10.1111/joim.12296 (2014).
- 281 4 Andersson, C. & Vasan, R. S. Epidemiology of cardiovascular disease in young  
282 individuals. *Nat Rev Cardiol* **15**, 230-240, doi:10.1038/nrcardio.2017.154 (2018).
- 283 5 Elliot, C. A. & Hamlin, M. J. Combined diet and physical activity is better than diet or  
284 physical activity alone at improving health outcomes for patients in New Zealand's  
285 primary care intervention. *BMC Publ Health* **18**, 230, doi:10.1186/s12889-018-5152-z  
286 (2018).
- 287 6 Lim, S. S. *et al.* A comparative risk assessment of burden of disease and injury  
288 attributable to 67 risk factors and risk factor clusters in 21 regions, 1990-2010: a  
289 systematic analysis for the Global Burden of Disease Study 2010. *Lancet* **380**, 2224-  
290 2260, doi:10.1016/s0140-6736(12)61766-8 (2012).
- 291 7 Ladejobi, A. O. *et al.* The 12-lead electrocardiogram as a biomarker of biological age.  
292 *Eur Heart J - Dig Health* **2**, 379-389, doi:10.1093/ehjdh/ztab043 (2021).
- 293 8 Attia, Z. I. *et al.* Age and Sex Estimation Using Artificial Intelligence From Standard  
294 12-Lead ECGs. *Circ Arrhythm Electrophysiol* **12**, e007284,  
295 doi:10.1161/circep.119.007284 (2019).

- 296 9 Ball, R. L., Feiveson, A. H., Schlegel, T. T., Starc, V. & Dabney, A. R. Predicting  
297 "heart age" using electrocardiography. *J Pers Med* **4**, 65-78, doi:10.3390/jpm4010065  
298 (2014).
- 299 10 Lima, E. M. *et al.* Deep neural network-estimated electrocardiographic age as a  
300 mortality predictor. *Nature Commun* **12**, 5117, doi:10.1038/s41467-021-25351-7  
301 (2021).
- 302 11 Lopez-Gonzalez, A. A. *et al.* Effectiveness of the Heart Age tool for improving  
303 modifiable cardiovascular risk factors in a Southern European population: a  
304 randomized trial. *Eur J Prev Cardiol* **22**, 389-396, doi:10.1177/2047487313518479  
305 (2015).
- 306 12 Soureti, A., Hurling, R., Murray, P., van Mechelen, W. & Cobain, M. Evaluation of a  
307 cardiovascular disease risk assessment tool for the promotion of healthier lifestyles.  
308 *Eur J Cardiovasc Prev Rehab* **17**, 519-523, doi:10.1097/HJR.0b013e328337ccd3  
309 (2010).
- 310 13 Groenewegen, K. A. *et al.* Vascular age to determine cardiovascular disease risk: A  
311 systematic review of its concepts, definitions, and clinical applications. *Eur J Prev*  
312 *Cardiol* **23**, 264-274, doi:10.1177/2047487314566999 (2016).
- 313 14 Parkes, G., Greenhalgh, T., Griffin, M. & Dent, R. Effect on smoking quit rate of  
314 telling patients their lung age: the Step2quit randomised controlled trial. *BMJ* **336**,  
315 598-600, doi:10.1136/bmj.39503.582396.25 (2008).
- 316 15 Maanja, M. *et al.* The electrical determinants of increased wall thickness and mass in  
317 left ventricular hypertrophy. *J Electrocardiol* **58**, 80-86,  
318 doi:10.1016/j.jelectrocard.2019.09.024 (2020).
- 319 16 Schlegel, T. T. *et al.* Accuracy of advanced versus strictly conventional 12-lead ECG  
320 for detection and screening of coronary artery disease, left ventricular hypertrophy and

- 321 left ventricular systolic dysfunction. *BMC Cardiovasc Disord* **10**, 28,  
322 doi:10.1186/1471-2261-10-28 (2010).
- 323 17 Johnson, K. *et al.* Advanced Electrocardiography Identifies Left Ventricular Systolic  
324 Dysfunction in Non-Ischemic Cardiomyopathy and Tracks Serial Change over Time. *J*  
325 *Cardiovasc Dev Dis* **2**, 93-107, doi:10.3390/jcdd2020093 (2015).
- 326 18 Gladding, P. A., Hewitt, W. & Schlegel, T. T. Going deep with ecg and aortic  
327 stenosis: Touchdown or incomplete pass? *J Am Heart Assoc* **9**, e016193-e016193,  
328 doi:10.1161/JAHA.120.016193 (2020).
- 329 19 The Lancet Respiratory Medicine, L. R. M. Opening the black box of machine  
330 learning. *Lancet Respir Med* **6**, 801-801, doi:10.1016/S2213-2600(18)30425-9 (2018).
- 331 20 Vrtovec, B., Sinkovec, M., Starc, V., Radovancevic, B. & Schlegel, T. T. Coronary  
332 artery disease alters ventricular repolarization dynamics in type 2 diabetes. *Pacing*  
333 *Clin Electrophysiol* **28 Suppl 1**, S178-181, doi:10.1111/j.1540-8159.2005.00076.x  
334 (2005).
- 335 21 Persson, E., Carlsson, M., Palmer, J., Pahlm, O. & Arheden, H. Evaluation of left  
336 ventricular volumes and ejection fraction by automated gated myocardial SPECT  
337 versus cardiovascular magnetic resonance. *Clin Physiol Funct Imaging* **25**, 135-141,  
338 doi:10.1111/j.1475-097X.2005.00599.x (2005).
- 339 22 Trägårdh, E. *et al.* High-frequency electrocardiogram analysis in the ability to predict  
340 reversible perfusion defects during adenosine myocardial perfusion imaging. *J*  
341 *Electrocardiol* **40**, 510-514, doi:10.1016/j.jelectrocard.2007.03.242 (2007).
- 342 23 Lang, R. M. *et al.* Recommendations for cardiac chamber quantification by  
343 echocardiography in adults: an update from the American Society of  
344 Echocardiography and the European Association of Cardiovascular Imaging. *Eur*  
345 *Heart J Cardiovasc maging* **16**, 233-270, doi:10.1093/ehjci/jev014 (2015).

- 346 24 Yamazaki, T., Froelicher, V. F., Myers, J., Chun, S. & Wang, P. Spatial QRS-T angle  
347 predicts cardiac death in a clinical population. *Heart rhythm* **2**, 73-78,  
348 doi:10.1016/j.hrthm.2004.10.040 (2005).
- 349 25 Fayn, J., Rubel, P., Pahlm, O. & Wagner, G. S. Improvement of the detection of  
350 myocardial ischemia thanks to information technologies. *Int J Cardiol* **120**, 172-180,  
351 doi:10.1016/j.ijcard.2006.09.025 (2006).
- 352 26 Kardys, I. *et al.* Spatial QRS-T angle predicts cardiac death in a general population.  
353 *European heart journal* **24**, 1357-1364, doi:10.1016/S0195-668X(03)00203-3 (2003).
- 354 27 Horinaka, S. *et al.* Ventricular gradient variability. New ECG method for detection of  
355 ischemic heart disease. *J Electrocardiol* **28**, 177-183, doi:10.1016/S0022-  
356 0736(05)80255-9 (1995).
- 357 28 Kors, J. A., van Herpen, G., Sittig, A. C. & van Bommel, J. H. Reconstruction of the  
358 Frank vectorcardiogram from standard electrocardiographic leads: diagnostic  
359 comparison of different methods. *Eur Heart J* **11**, 1083-1092 (1990).
- 360 29 Zabel, M. *et al.* Analysis of T-wave morphology from the 12-lead electrocardiogram  
361 for prediction of long-term prognosis in male US veterans. *Circulation* **105**, 1066-  
362 1070, doi:10.1161/hc0902.104598 (2002).
- 363 30 Okin, P. M. *et al.* Repolarization Abnormality for Prediction of All-Cause and  
364 Cardiovascular Mortality in American Indians: The Strong Heart Study. *J Cardiovasc*  
365 *Electrophysiol* **16**, 945-951, doi:10.1111/j.1540-8167.2005.40808.x (2005).
- 366 31 Priori, S. G. *et al.* Evaluation of the spatial aspects of T-wave complexity in the long-  
367 QT syndrome. *Circulation* **96**, 3006-3012, doi:10.1161/01.CIR.96.9.3006 (1997).
- 368 32 Chhabra, L., Devadoss, R., Chaubey, V. K. & Spodick, D. H. Interatrial Block in the  
369 Modern Era. *Curr Cardiol Rev* **10**, 181-189,  
370 doi:10.2174/1573403X10666140514101748 (2014).

- 371 33 Lindow, T. & Lindqvist, P. The Prevalence of Advanced Interatrial Block and Its  
372 Relationship to Left Atrial Function in Patients with Transthyretin Cardiac  
373 Amyloidosis. *J Clin Med* **10**, doi:10.3390/jcm10132764 (2021).
- 374 34 Rautaharju, P. M., Mason, J. W. & Akiyama, T. New age- and sex-specific criteria for  
375 QT prolongation based on rate correction formulas that minimize bias at the upper  
376 normal limits. *Int J Cardiol* **174**, 535-540, doi:10.1016/j.ijcard.2014.04.133 (2014).
- 377 35 Shah, S. R., Park, K. & Alweis, R. Long QT Syndrome: A Comprehensive Review of  
378 the Literature and Current Evidence. *Curr Prob Cardiol* **44**, 92-106,  
379 doi:10.1016/j.cpcardiol.2018.04.002 (2019).
- 380 36 Nielsen, J. B. *et al.* Risk prediction of cardiovascular death based on the QTc interval:  
381 evaluating age and gender differences in a large primary care population. *Eur Heart J*  
382 **35**, 1335-1344, doi:10.1093/eurheartj/ehu081 (2014).
- 383 37 Goorakani, Y. *et al.* Correlation of resting heart rate with anthropometric factors and  
384 serum biomarkers in a population-based study: Fasa PERSIAN cohort study. *BMC*  
385 *Cardiovas Disord* **20**, 319-319, doi:10.1186/s12872-020-01594-y (2020).
- 386 38 Ogliari, G. *et al.* Resting heart rate, heart rate variability and functional decline in old  
387 age. *Can Med Assoc J* **187**, E442-e449, doi:10.1503/cmaj.150462 (2015).
- 388 39 Morcet, J. F., Safar, M., Thomas, F., Guize, L. & Benetos, A. Associations between  
389 heart rate and other risk factors in a large French population. *J Hyperten* **s17**, 1671-  
390 1676, doi:10.1097/00004872-199917120-00003 (1999).
- 391 40 Evans, J. G., Prior, I. A. & Tunbridge, W. M. Age-associated change in QRS axis:  
392 intrinsic or extrinsic ageing? *Gerontology* **28**, 132-137, doi:10.1159/000212523  
393 (1982).



- 394 41 Bergfeldt, L. *et al.* Spatial peak and mean QRS-T angles: A comparison of similar but  
395 different emerging risk factors for cardiac death. *J Electrocardiol***61**, 112-120,  
396 doi:10.1016/j.jelectrocard.2020.05.013 (2020).
- 397 42 Ringborn, M. M. D. *et al.* Comparison of high-frequency QRS components and ST-  
398 segment elevation to detect and quantify acute myocardial ischemia. *J Electrocardiol*  
399 **43**, 113-120, doi:10.1016/j.jelectrocard.2009.11.009 (2010).
- 400 43 Trägårdh, E., Pahlm, O., Wagner, G. S. & Pettersson, J. Reduced high-frequency QRS  
401 components in patients with ischemic heart disease compared to normal subjects. *J*  
402 *Electrocardiol* **37**, 157-162, doi:10.1016/j.jelectrocard.2004.02.004 (2004).
- 403 44 Schlegel, T. T. *et al.* Real-Time 12-Lead High-Frequency QRS Electrocardiography  
404 for Enhanced Detection of Myocardial Ischemia and Coronary Artery Disease. *Mayo*  
405 *Clin Proc* **79**, 339-350, doi:10.4065/79.3.339 (2004).
- 406 45 Yoon, C. H., Torrance, R. & Scheinerman, N. Machine learning in medicine: should  
407 the pursuit of enhanced interpretability be abandoned? *J Med Ethics*,  
408 doi:10.1136/medethics-2020-107102 (2021).
- 409 46 Brisk, R. *et al.* The effect of confounding data features on a deep learning algorithm to  
410 predict complete coronary occlusion in a retrospective observational setting. *Eur*  
411 *Heart J - Dig Health* **2**, 127-134, doi:10.1093/ehjdh/ztab002 (2021).
- 412 47 Siontis, K. C. *et al.* Use of Artificial Intelligence Tools Across Different Clinical  
413 Settings: A Cautionary Tale. *Circ Cardiovasc Qual Outcomes***14**, e008153,  
414 doi:10.1161/circoutcomes.121.008153 (2021).

415

416

417

**Table 1.** Baseline characteristics

|                                  | All<br>(n=2,771) | Healthy<br>(n=1,682) | Subjects at<br>CV risk<br>(n=305) | Patients with<br>CV disease<br>(n=784) | p      |
|----------------------------------|------------------|----------------------|-----------------------------------|----------------------------------------|--------|
| Age, years                       | 46.2 (16.0)      | 38.6 (13.0)          | 54.8 (11.2)                       | 59.0 (13.2)                            | <0.001 |
| Male sex, n (%)                  | 1645 (59.4)      | 999 (59.4)           | 163 (53.4)                        | 483 (61.6)                             | 0.048  |
| 5-minute ECG<br>Heart Age, years | 51.1 (21.7)      | 38.3 (14.1)          | 61.9 (13.2)                       | 74.2 (15.6)                            | <0.001 |
| CAD, n (%)                       | 421 (15.2)       | -                    | -                                 | 421 (53.7)                             | -      |
| ICM, n (%)                       | 120 (4.3)        | -                    | -                                 | 120 (15.3)                             | -      |
| HCM, n (%)                       | 92 (3.3)         | -                    | -                                 | 92 (11.7)                              | -      |
| LVH, n (%)                       | 96 (3.5)         | -                    | -                                 | 96 (12.2)                              | -      |
| NICM, n (%)                      | 53 (1.9)         | -                    | -                                 | 53 (6.8)                               | -      |

Age and 5-minute ECG Heart Age are presented as mean (standard deviation).

Abbreviations: CAD: coronary artery disease; ICM: ischemic cardiomyopathy; HCM: hypertrophic cardiomyopathy; LVH: left ventricular hypertrophy; NICM: non-ischemic cardiomyopathy

418

419

420

421

422

423

424

425

426

427

428

429

430

**Table 2.** Measures included in the 10-second ECG Heart Age (male patients)

| Measure                                                                                | Estimate | Standard error | t ratio |
|----------------------------------------------------------------------------------------|----------|----------------|---------|
| <i>(Intercept)</i>                                                                     | -60.575  | 2.353          | -25.73  |
| Age, years                                                                             | 0.820    | 0.007          | 113.73  |
| P-wave duration, ms                                                                    | 0.288    | 0.007          | 39.99   |
| Spatial QT interval, ms                                                                | 0.081    | 0.004          | 22.86   |
| Heart rate, min <sup>-1</sup>                                                          | 0.242    | 0.012          | 20.02   |
| QRS max amplitude in VCG lead Y, $\mu$ V                                               | -0.007   | 0.000          | -18.20  |
| Frontal plane QRS axis, radians                                                        | -5.834   | 0.395          | -14.75  |
| T-wave complexity, $\text{Ln} \sum(\text{EV}3:8) / (\text{EV}1-\text{EV}2)$ , unitless | 2.152    | 0.164          | 13.12   |
| Spatial ventricular gradient minus Spatial mean QRS, mV*s                              | -55.841  | 4.464          | -12.51  |
| Male sex (value=1)                                                                     | 1.996    | 0.215          | 9.27    |
| QRS RMS in VCG vector magnitude lead, mV                                               | 10.315   | 1.612          | 6.40    |
| QRS average spatial velocity in VCG vector magnitude lead, mV/s                        | 0.106    | 0.017          | 6.30    |
| Portion of QRS loop in posterior superior quadrant of left sagittal plane by VCG, %    | 0.033    | 0.009          | 3.55    |

Abbreviations: Ln: Natural logarithm; EV: Eigenvalues; VCG: vectocardiographic; RMS: root mean square

**Table 3.** Measures included in the 10-second ECG Heart Age (female patients)

| Measure                                                                                | Estimate | Standard error | t ratio |
|----------------------------------------------------------------------------------------|----------|----------------|---------|
| <i>(Intercept)</i>                                                                     | -70.477  | 2.662          | -26.47  |
| Age, years                                                                             | 0.850    | 0.008          | 104.26  |
| P-wave duration, ms                                                                    | 0.331    | 0.008          | 40.73   |
| Spatial QT interval, ms                                                                | 0.095    | 0.004          | 23.58   |
| Heart rate, min <sup>-1</sup>                                                          | 0.281    | 0.014          | 20.57   |
| QRS max amplitude in VCG lead Y, $\mu$ V                                               | -0.009   | 0.000          | -18.54  |
| Frontal plane QRS axis, radians                                                        | -6.354   | 0.447          | -14.21  |
| Spatial ventricular gradient minus Spatial mean QRS, mV*s                              | -67.642  | 5.049          | -13.40  |
| T-wave complexity, $\text{Ln} \sum(\text{EV3:8}) / (\text{EV1}-\text{EV2})$ , unitless | 2.359    | 0.185          | 12.72   |
| QRS RMS in VCG vector magnitude lead, mV                                               | 11.701   | 1.822          | 6.42    |
| QRS average spatial velocity in VCG vector magnitude lead, mV/s                        | 0.116    | 0.019          | 6.10    |
| Portion of QRS loop in posterior superior quadrant of left sagittal plane by VCG, %    | 0.034    | 0.010          | 3.22    |

Abbreviations: Ln: Natural logarithm; EV: Eigenvalues; VCG: vectocardiographic; RMS: root mean square

432

433

434

435

436

437

438

439 **Figure 1.** Left panel: Scatter plot showing the relation between the 10-second ECG Heart Age  
440 and the 5-minute ECG Heart Age in all participants. The  $R^2$  value was 0.94 ( $p < 0.001$ ). Right  
441 panel: Bland-Altman plot showing the difference between the 10-second and 5-minute ECG  
442 Heart Age in relation to the mean of both ECG Heart Ages. The agreement between methods  
443 is strong, with minimal deviation from the identity line (dashed) or bias ( $0.0 \pm 5.2$  years).

444

445 **Figure 2.**

446 *Panel A:* The difference between the 10-second ECG Heart Age and chronological age in  
447 healthy subjects (left, dark green), subjects at cardiovascular (CV) risk (middle, light blue),  
448 and patients with CV disease (right, yellow). On average, there is no difference between ECG  
449 Heart Age and chronological age in healthy subjects. ECG Heart Age is higher in subjects at  
450 CV risk, and highest for those with overt CV disease.

451 *Panel B:* Scatter plots showing the relationship between the 10-second ECG Heart Age and  
452 chronological age in healthy subjects (left, dark green), subjects at CV risk (middle, light  
453 blue), and patients with CV disease (right, yellow). The dashed diagonal line is the identity  
454 line, i.e. indicating no difference between ECG Heart Age and chronological age.

455

456 **Figure 3.** Example of the transparency and explainability of the ECG Heart Age from two  
457 subjects with equal chronological age but different ECG Heart Ages, illustrated by a  
458 commensurately aged female heart, but a disproportionately aged male heart. The ECG  
459 measures for each of the two patients are shown in the table in the middle of the figure,  
460 presented in the order of the relative strength (strongest first, based on t ratio [not shown]) of  
461 contribution to the ECG Heart Age. Notably, P-wave duration is markedly different between  
462 these two patients, and heart rate is higher for the male than the female, helping drive the  
463 ECG Heart Age higher in the male. The R-wave amplitude in lead Y is also much larger in the

464 female, and the difference between the spatial ventricular gradient and the spatial mean QRS  
465 in the female is also larger, likely due to preserved T-wave amplitudes, contributing to her  
466 relatively younger ECG Heart Age. Furthermore, likely due to ischemic myocardial injuries,  
467 T-wave complexity is increased in the male, suggesting that increased myocardial  
468 repolarization heterogeneity also contributes to driving ECG Heart Age higher in the male, in  
469 spite of his shorter QT interval.

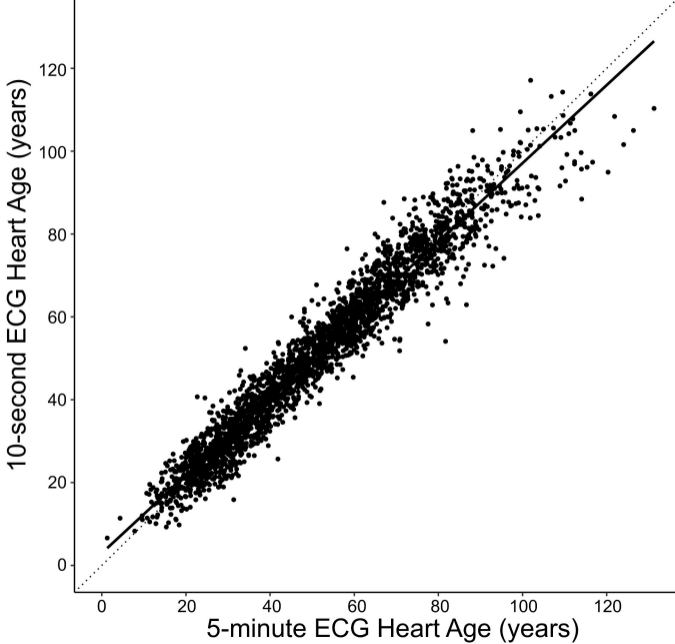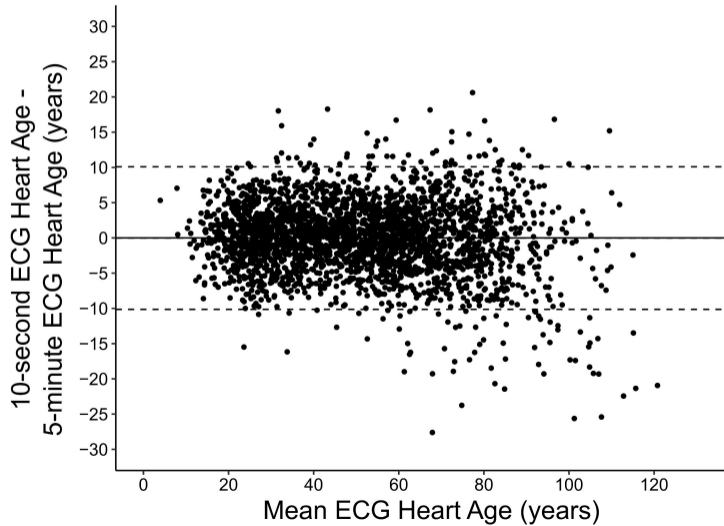

**A**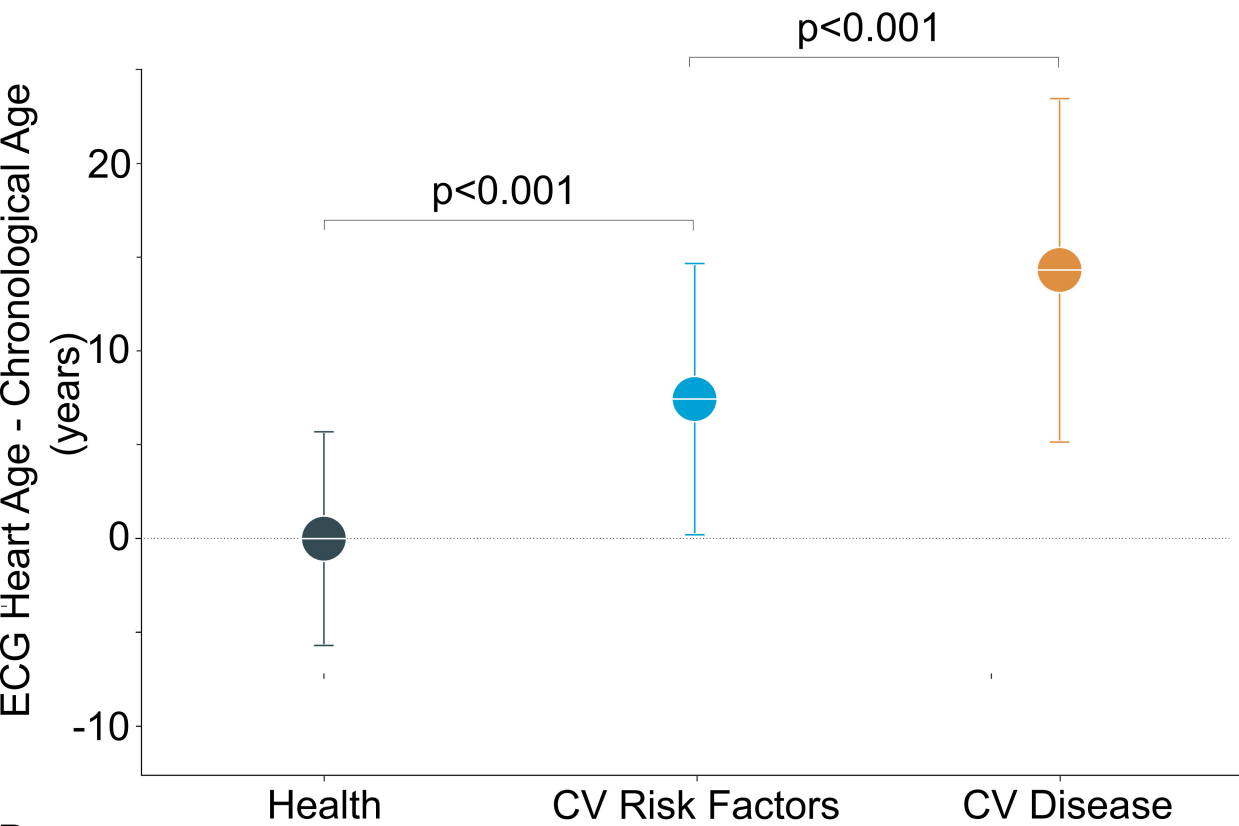**B**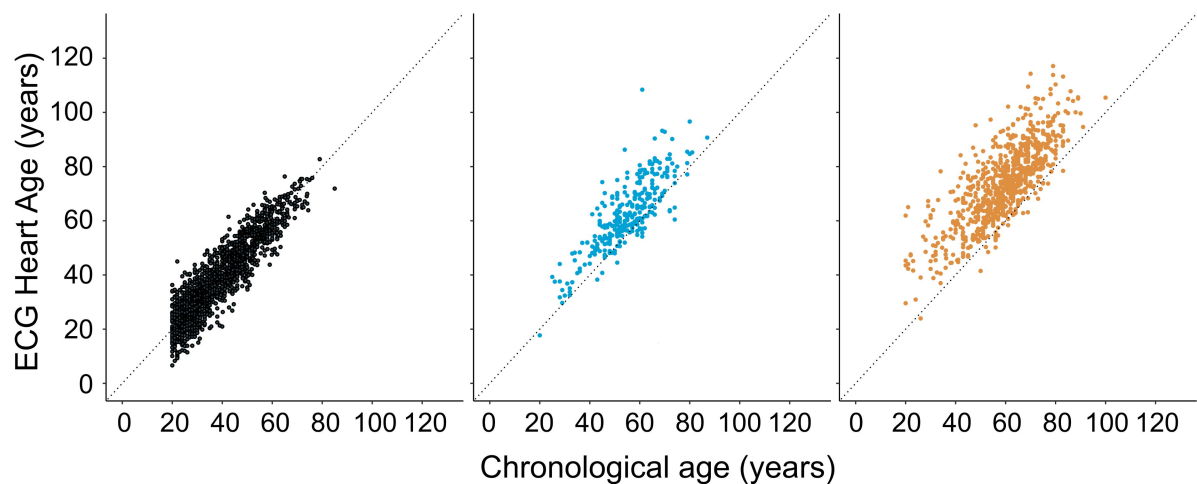



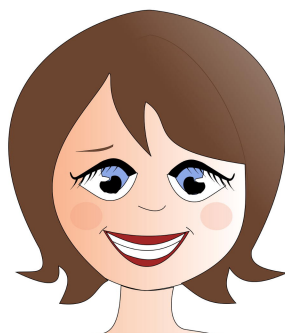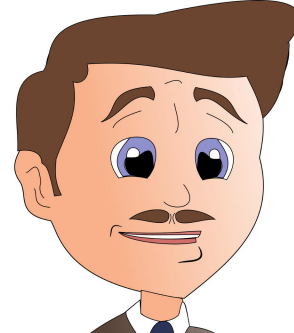

60-year old, healthy female  
without cardiovascular  
risk factors or medications

60-year old male with  
heart failure following  
myocardial infarction

### ECG measures

|                                                                                     |              |              |
|-------------------------------------------------------------------------------------|--------------|--------------|
| P-wave duration                                                                     | 90 ms        | 148 ms       |
| Spatial QT interval                                                                 | 447 ms       | 380 ms       |
| Heart rate                                                                          | 55/min       | 70/min       |
| QRS max amplitude in VCG lead Y                                                     | 835 $\mu$ V  | 299 $\mu$ V  |
| Frontal plane QRS axis                                                              | 0.58 radians | 0.64 radians |
| Spatial ventricular gradient - spatial mean QRS                                     | 0.038 mV*s   | 0.003 mV*s   |
| T-wave complexity, Ln                                                               | -1.92        | 1.21         |
| QRS RMS in VCG vector magnitude lead                                                | 0.43 mV      | 0.31 mV      |
| QRS average spatial velocity in<br>vector magnitude lead                            | 39.1 mV/s    | 23.5 mV/s    |
| Portion of QRS loop in posterior superior<br>quadrant of left sagittal plane by VCG | 12.7%        | 25.2%        |

### ECG HEART AGE

60 years

79 years

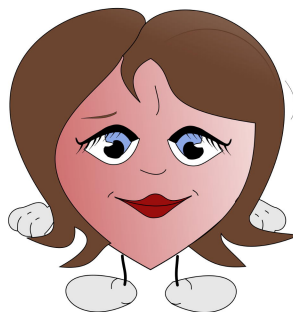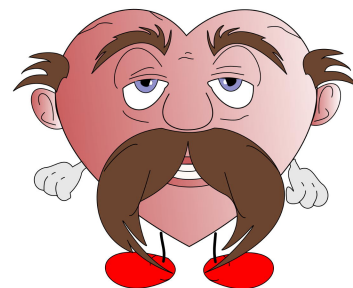

Source: https://medrxiv.org/content/10.1101/2021.12.08.21267378v1.full.pdf
